# Supplementary material for: Temperature and acidity dependence of secondary organic aerosol formation from α-pinene ozonolysis with a compact chamber system
Source: Copernicus journal article supplement (doi:10.5194/acp-2020-798), 2020-09-17
Supplement: Supplementary file 1 [file acp-2020-798-supplement.zip]

Supplement of

# **Temperature and acidity dependence of secondary organic aerosol formation from $\alpha$ -pinene ozonolysis with a compact chamber system**

Yange Deng<sup>1</sup>, Satoshi Inomata<sup>1\*</sup>, Kei Sato<sup>1</sup>, Sathiyamurthi Ramasamy<sup>1</sup>, Yu Morino<sup>1</sup>, Shinichi Enami<sup>1</sup>,  
5 Hiroshi Tanimoto<sup>1</sup>

<sup>1</sup>National Institute for Environmental Studies, Tsukuba 305-8506, Japan

*Correspondence to:* Satoshi Inomata (ino@nies.go.jp)

**Table S1: Summary of  $\alpha$ -pinene ozonolysis experiments under neutral seed conditions.**

| Exp. No.        | Temp (K) | RH (%) | $\alpha$ -Pinene (ppbv) | O <sub>3</sub> (ppbv) <sup>c</sup> | Seed (cm <sup>-3</sup> ) | SOA ( $\mu\text{g m}^{-3}$ ) | Yield |
|-----------------|----------|--------|-------------------------|------------------------------------|--------------------------|------------------------------|-------|
| 1               |          |        | 150 <sup>b</sup>        | 640 <sup>b</sup>                   | 2.78E+04                 | 136                          | 0.171 |
| 2 <sup>a</sup>  |          |        | 323 <sup>b</sup>        | 698 <sup>b</sup>                   | 2.93E+04                 | 595                          | 0.349 |
| 3               |          |        | 150 <sup>b</sup>        | 745 <sup>b</sup>                   | 2.64E+04                 | 145                          | 0.182 |
| 4               | 298      | ~26–27 | 252 <sup>b</sup>        | 753 <sup>b</sup>                   | 3.93E+04                 | 417                          | 0.314 |
| 5               |          |        | 205 <sup>c</sup>        | >652 <sup>c</sup>                  | 2.66E+04                 | 307                          | 0.283 |
| 6               |          |        | 54 <sup>c</sup>         | >592 <sup>c</sup>                  | 4.46E+04                 | 37                           | 0.133 |
| 7               |          |        | 67.7 <sup>c</sup>       | >670 <sup>c</sup>                  | 3.21E+04                 | 25                           | 0.07  |
| 8               |          |        | 110 <sup>b</sup>        | 748 <sup>b</sup>                   | 2.09E+04                 | 167                          | 0.277 |
| 9               |          |        | 244 <sup>b</sup>        | 749 <sup>b</sup>                   | 1.96E+04                 | 524                          | 0.39  |
| 10              |          |        | 220 <sup>b</sup>        | 742 <sup>b</sup>                   | 2.58E+04                 | 456                          | 0.375 |
| 11 <sup>a</sup> | 288      | ~32–34 | 307 <sup>b</sup>        | 770 <sup>b</sup>                   | 2.46E+04                 | 741                          | 0.439 |
| 12              |          |        | 230 <sup>c</sup>        | >572 <sup>c</sup>                  | 2.31E+04                 | 518                          | 0.406 |
| 13              |          |        | 40 <sup>c</sup>         | >682 <sup>c</sup>                  | 2.42E+04                 | 38                           | 0.174 |
| 14              |          |        | 42 <sup>c</sup>         | >654 <sup>c</sup>                  | 2.91E+04                 | 19                           | 0.085 |
| 15              |          |        | 157 <sup>b</sup>        | 723 <sup>b</sup>                   | 2.29E+04                 | 271                          | 0.301 |
| 16 <sup>a</sup> |          |        | 252 <sup>b</sup>        | 710 <sup>b</sup>                   | 2.42E+04                 | 608                          | 0.424 |
| 17              |          |        | 118 <sup>b</sup>        | 746 <sup>b</sup>                   | 2.30E+04                 | 236                          | 0.351 |
| 18              | 278      | ~45–55 | 165 <sup>b</sup>        | 721 <sup>b</sup>                   | 2.27E+04                 | 350                          | 0.372 |
| 19              |          |        | 290 <sup>c</sup>        | >593 <sup>c</sup>                  | 1.74E+04                 | 862                          | 0.52  |
| 20              |          |        | 27 <sup>c</sup>         | >649 <sup>c</sup>                  | 4.26E+04                 | 14                           | 0.093 |
| 21              |          |        | 40 <sup>c</sup>         | >646 <sup>c</sup>                  | 2.88E+04                 | 34                           | 0.154 |

<sup>a</sup> Aerosols were sampled onto Teflon filters for LC-TOF-MS analysis.

<sup>b</sup>  $\alpha$ -Pinene was introduced into the chamber after ozone. The presented concentration of  $\alpha$ -pinene is the highest recorded concentration, and the presented ozone concentration is before the start of the ozonolysis reactions.

<sup>c</sup>  $\alpha$ -Pinene was introduced into the chamber before ozone. The presented  $\alpha$ -pinene concentration is before the start of the ozonolysis reactions and the ozone concentration is the highest at the start of the reactions.

**Table S2: Summary of  $\alpha$ -pinene ozonolysis experiments under acidic seed conditions.**

| Exp. No.        | Temp (K) | RH (%) | $\alpha$ -Pinene (ppbv) <sup>b</sup> | O <sub>3</sub> (ppbv) <sup>c</sup> | Seed (cm <sup>-3</sup> ) | SOA ( $\mu\text{g m}^{-3}$ ) | Yield |
|-----------------|----------|--------|--------------------------------------|------------------------------------|--------------------------|------------------------------|-------|
| 22 <sup>a</sup> |          |        | 236                                  | >499                               | 1.73E+04                 | 450                          | 0.367 |
| 23              |          |        | 310                                  | >190 <sup>d</sup>                  | 3.02E+04                 | 487                          | 0.296 |
| 24              |          |        | 197                                  | >476                               | 2.73E+04                 | 212                          | 0.202 |
| 25              |          |        | 145                                  | >722                               | 2.32E+04                 | 186                          | 0.247 |
| 26              | 298      | ~26–27 | 243                                  | >740                               | 2.85E+04                 | 356                          | 0.282 |
| 27              |          |        | 145                                  | >824                               | 9.61E+03                 | 200                          | 0.263 |
| 28              |          |        | 314                                  | >600                               | 1.90E+04                 | 441                          | 0.267 |
| 29              |          |        | 55                                   | >658                               | 1.82E+04                 | 55                           | 0.192 |
| 30              |          |        | 51                                   | >677                               | 1.87E+04                 | 24                           | 0.092 |
| 31 <sup>a</sup> |          |        | 299                                  | >409                               | 2.13E+04                 | 661                          | 0.409 |
| 32              |          |        | 126                                  | >653                               | 1.45E+04                 | 213                          | 0.314 |
| 33              | 288      | ~32–34 | 228                                  | >622                               | 1.69E+04                 | 428                          | 0.347 |
| 34              |          |        | 291                                  | >596                               | 1.71E+04                 | 592                          | 0.377 |
| 35              |          |        | 84                                   | >684                               | 1.39E+04                 | 81                           | 0.176 |
| 36 <sup>a</sup> |          |        | 312                                  | >373                               | 2.18E+04                 | 737                          | 0.416 |
| 37              |          |        | 252                                  | >595                               | 1.80E+04                 | 767                          | 0.558 |
| 38              | 278      | ~45–55 | 143                                  | >645                               | 1.65E+04                 | 345                          | 0.433 |
| 39              |          |        | 200                                  | >612                               | 1.65E+04                 | 525                          | 0.472 |
| 40              |          |        | 52                                   | >666                               | 1.48E+04                 | 70                           | 0.237 |

<sup>a</sup> Aerosols were sampled onto Teflon filters for LC-TOF-MS analysis.

<sup>b</sup> Initial  $\alpha$ -pinene concentration before the start of the reactions is presented.

20 <sup>c</sup>  $\alpha$ -Pinene was introduced earlier than ozone. Thus, the values recorded here are the highest concentrations at the start of the  $\alpha$ -pinene ozonolysis reactions, except Exp. No. 23.

<sup>d</sup> Only the ozone concentration at the end of the experiment was recorded.

25

**Table S3: SOA compounds identified through LC-ToF-MS analysis: the m/z, chemical formula, retention time in LC column, and saturation concentration. It is presented in a separate Excel file.**

30

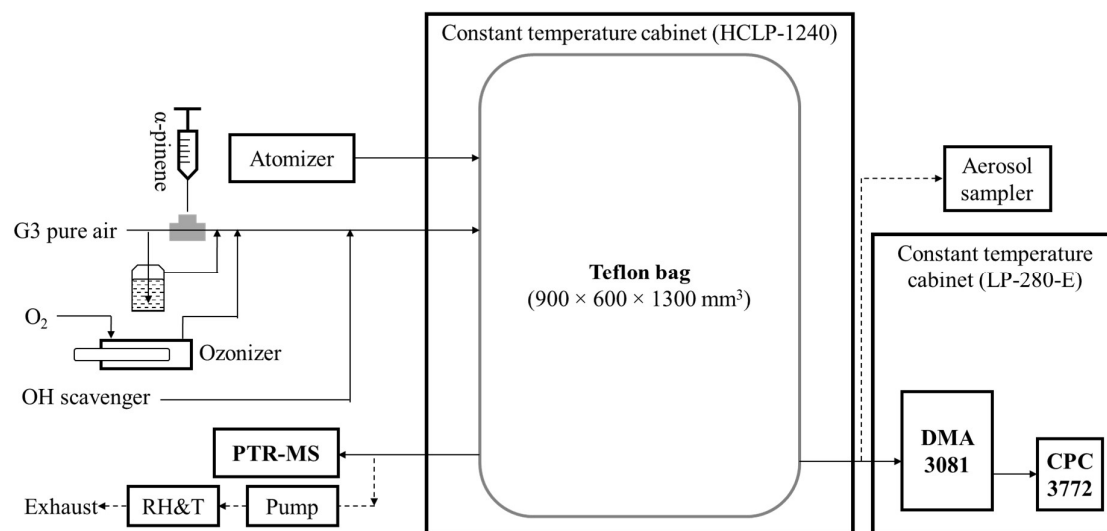

35

**Figure S1:** A schematic plot of the compact chamber system. PTR-MS, proton transfer reaction mass spectrometry; DMA, differential mobility analyser; CPC, condensation particle counter.

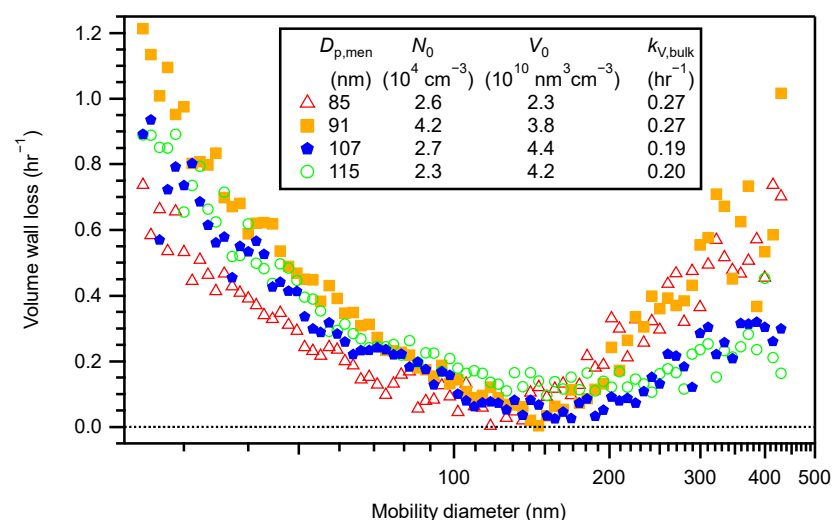

40

**Figure S2:** Size-resolved wall loss rates measured under an RH range of 17–23 %. The legend indicates the mean particle diameter during the wall loss rate measurement ( $D_{p,mean}$ ), the initial total particle number ( $N_0$ ) and volume ( $V_0$ ) concentrations, and the bulk volume wall-loss constant ( $k_{v,bulk}$ ).

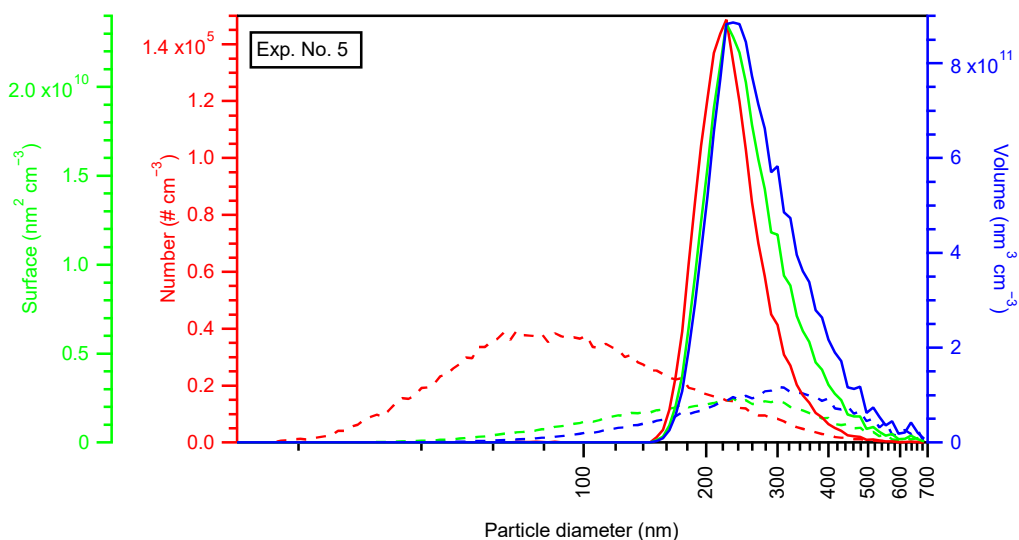

45 **Figure S3:** Number-, surface-, and volume-size distributions of aerosols before the start (i.e., seed aerosols, dashed curves) and at the end (i.e., 90 min after the start of the  $\alpha$ -pinene ozonolysis reaction, solid curves) of a typical experimental run.

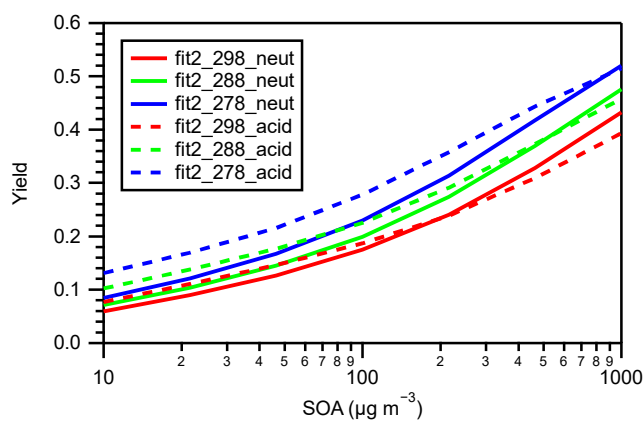

**Figure S4:** SOA yields versus SOA mass loadings under neutral and acidic seed conditions at different temperatures based on four-product VBS model fittings.

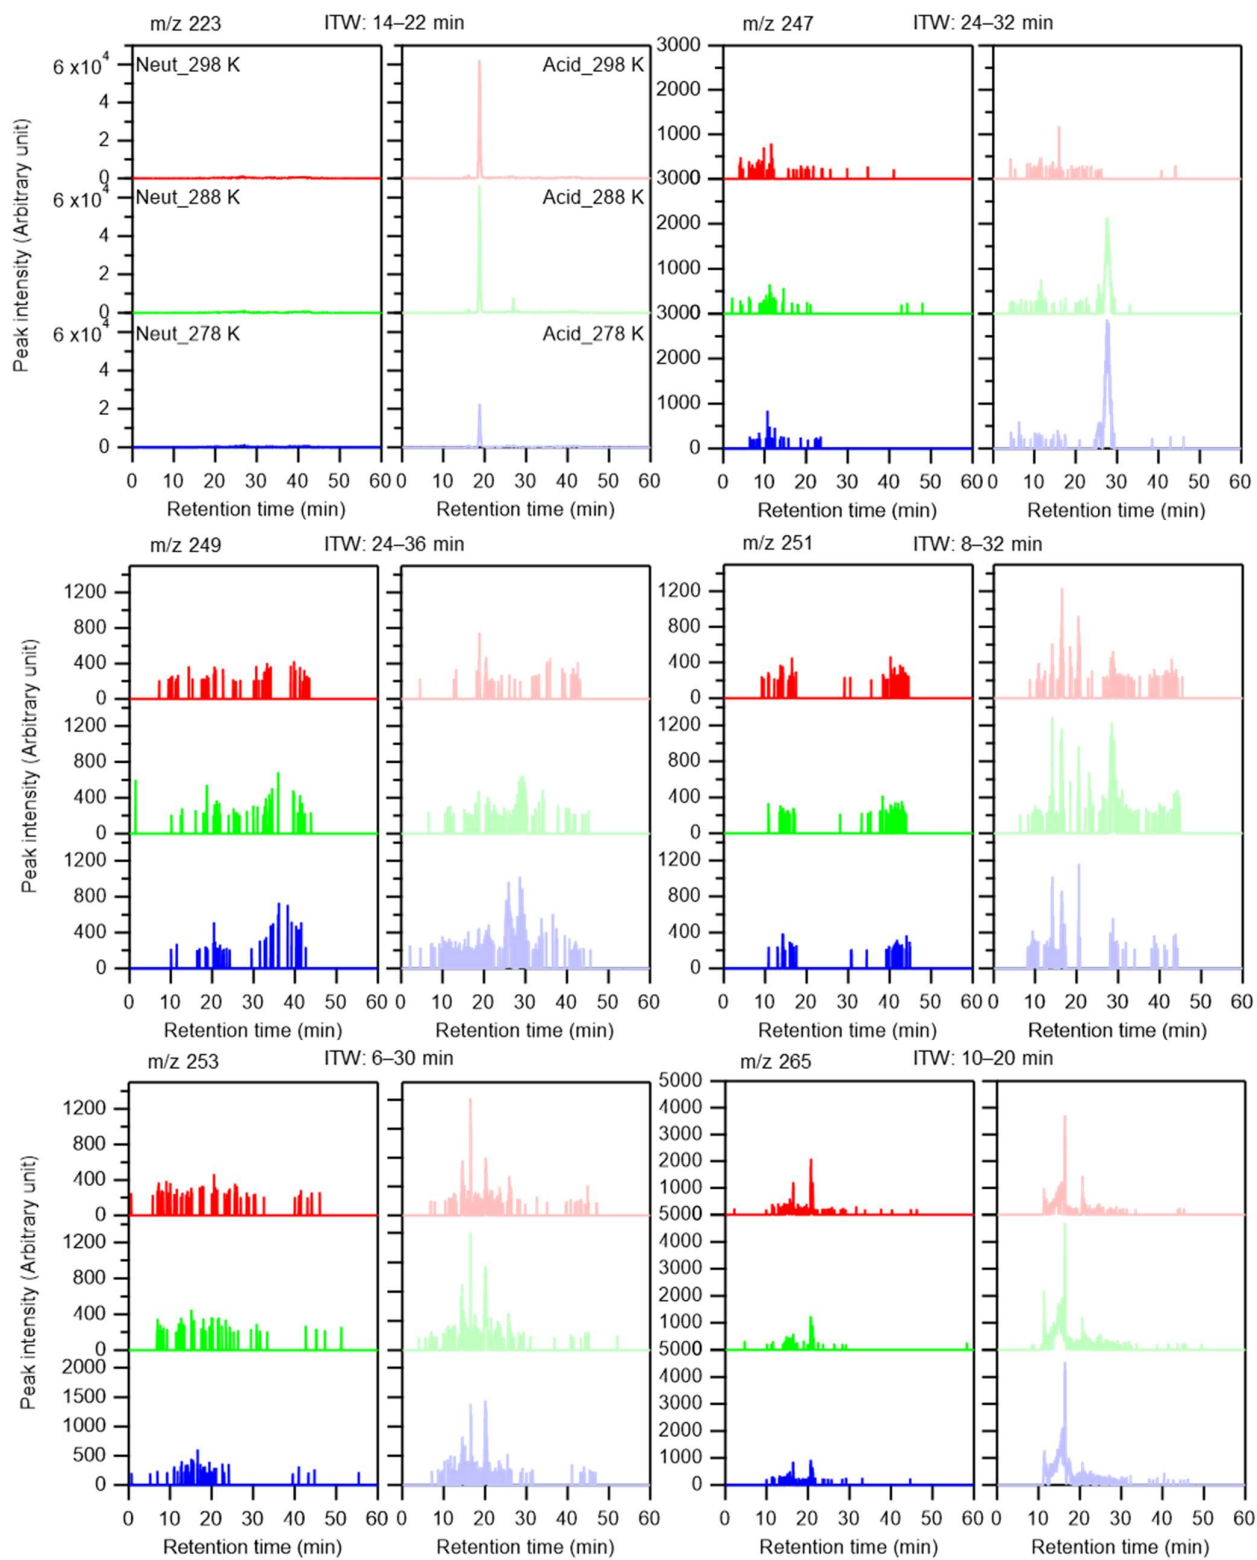

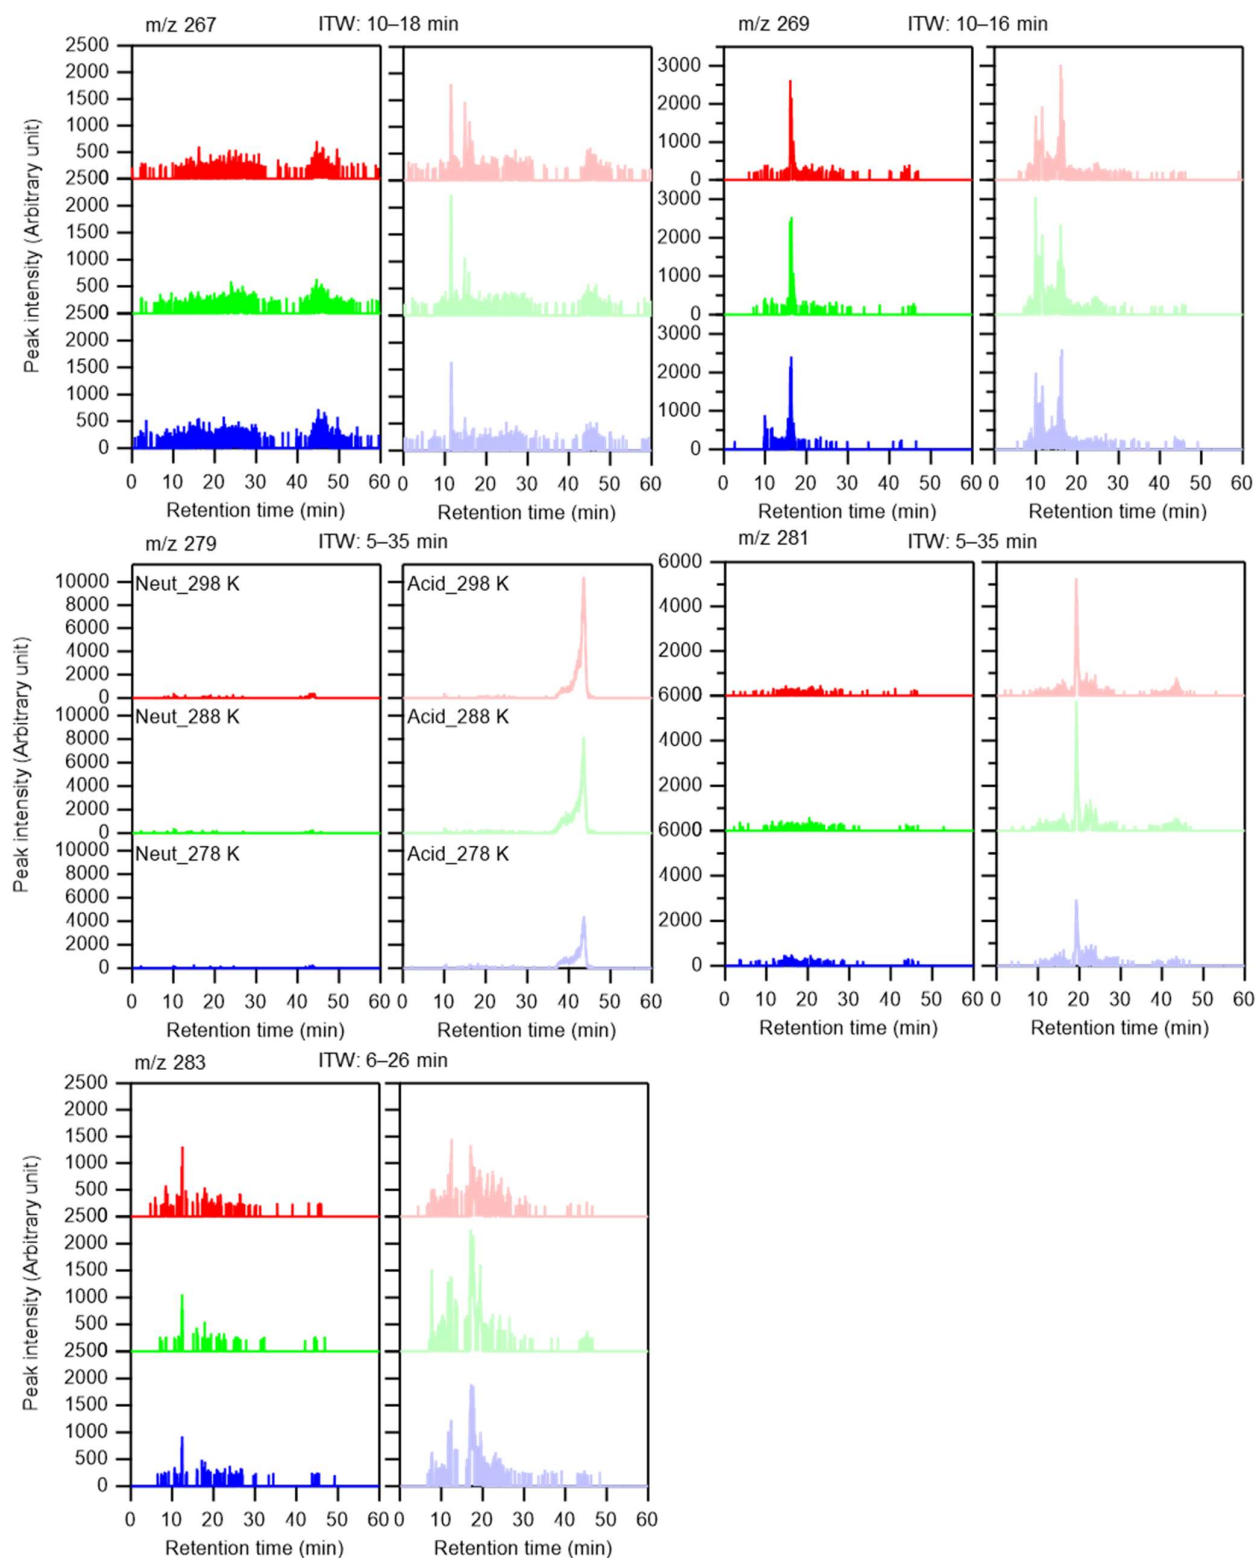

**Figure S5: Extracted ion chromatograms of 11 organosulfates under different experimental conditions. The integration time window (ITW) used for the derivation of the signal intensity of each OS compound is also presented.**
